# Supplementary material for: A Novel L-Asparaginase from Hyperthermophilic Archaeon Thermococcus sibiricus: Heterologous Expression and Characterization for Biotechnology Application
Source: MDPI journal article supplement (doi:10.3390/ijms22189894), 2021-09-13

## Supplementary Material

**Figure S1.** Sequence alignment of wild-type *tsA\_wt* and codon-optimized *tsA\_mod* genes

|                      |     |                                                                                       |     |
|----------------------|-----|---------------------------------------------------------------------------------------|-----|
| <i>tsA_wt/1-996</i>  | 1   | ATGAA AAAACTCTTAATCATCGGTACCGGTGGACGATTGCAAGCGCTAAAACAGAACAAAGGATACAAAAGTGTCCTCAAA    | 81  |
| <i>tsA_mod/1-996</i> | 1   | ATGAAAGAAAGTTACTGATTATTGGCACTGGCGGCACAATCGCTTCGGCAAGACGGAGCAGGGTTATAAGAGCGTGTGAAAG    | 81  |
| <i>tsA_wt/1-996</i>  | 82  | ATAGATGAAATACCTTAACCTAGCCAAAATAAACTAGAAAATGGATATAAAATCGATAGCACCAATATTATGAACATAGAC     | 162 |
| <i>tsA_mod/1-996</i> | 82  | ATCGACGAGATTCTCAAGCTTGCAAGATCAAGCTTGAGAACGGCTACCAAGATTGACTCCACGAACATCATGAATATTGAT     | 162 |
| <i>tsA_wt/1-996</i>  | 163 | AGCACTCTGATACACCCCTGAAGACTGGGAAATTATAGCTAAAGAGGTTTTCAGGCTCTTGATGATTATGATGGCATTATA     | 243 |
| <i>tsA_mod/1-996</i> | 163 | TCCAGCTTGATTTCATCCAGAGGATGGGAGATCATCGCGAAGGAAAGTCTTTAAAGCACTCGACGACATCGACGGTATCATT    | 243 |
| <i>tsA_wt/1-996</i>  | 244 | ATAACCCATGGAAACAGACACTTTGSCCTACACCGCTTCAATGTTAAGTTTCATGATAAAAAACCCCAACAAACCAATTGTA    | 324 |
| <i>tsA_mod/1-996</i> | 244 | ATTACTCACGGGACCAGATACCTTAGCGTATAGTGCATCTATGTTGCTTTTATGATTAAAGAAATCCGAATAAGCCATATCGTG  | 324 |
| <i>tsA_wt/1-996</i>  | 325 | CTCACTGGCTCTATGTTGCCAATAACAGAAAATGGAAGTGATGCCCCAGAAAACATCAGAACTGCCATAAAATTTCGAATG     | 405 |
| <i>tsA_mod/1-996</i> | 325 | TTCAGCCGGGAGCATGCTCCCGATTACCGAGAACGGCTCAGACGCTCCGCGTAATATTCTAGCCGCTATCAAGTTCCGCATG    | 405 |
| <i>tsA_wt/1-996</i>  | 406 | GAGATGTGCGCAGGTGTTTTTGTAGCTTTTCATGGATAAAATAATGCTGGGTTGTAGGACATCTAAGGTTAGAACCTTCGGC    | 486 |
| <i>tsA_mod/1-996</i> | 406 | GAAAGACGTTGCGCGGCGTGTTCTGTGGCGTTTATGGACAAGATTATGTTGGGCTGCCGTACGAGCAAAAGTCCGCACTTTGGGG | 486 |
| <i>tsA_wt/1-996</i>  | 487 | CTAAATGCATTTATGAGCATAAAATTACCCCTGATGTGGCTTATGTAAAAGGAGAAAAGATCTTATACAATATCCCAAGAA     | 567 |
| <i>tsA_mod/1-996</i> | 487 | CTTAAACGCCCTTCATGTCCTATCAACTATCCGGACGTCGCCCTACGTGAAGGGCGAGAAAATCTGTATAACATTCCAAAGGAG  | 567 |
| <i>tsA_wt/1-996</i>  | 568 | AAATTCCAACCAAAATGGTAGCCCTGAGCTAGATACAAAGTATGAACCAAGGGTTGTGTTTAAAGAGTTACCCCTGGCTTA     | 648 |
| <i>tsA_mod/1-996</i> | 568 | AAGTTTCAGCCGAAACGGCTCTCCAGAACTGGACACCAAAATACGAGCCGGCGCGTGGAAGTACTGCGTGTAACCTCCGGGACTG | 648 |
| <i>tsA_wt/1-996</i>  | 649 | GGGGGAGAGATCATAGATGCAGTCTTAGATGCTGGATATAAAGGCATAGTGCTAGAAGGCTATGGTGCGGGTGCTCTCCA      | 729 |
| <i>tsA_mod/1-996</i> | 649 | GGTGGGGAAATTATTGACGCTGTGCTGGAACGGGGTTACAAAGGGTATTGTTTGGAAAGGTTACGGCGCCGGCGGGCTGCCG    | 729 |
| <i>tsA_wt/1-996</i>  | 730 | TATAGAAAGAGTAATCTTCTAAGCAAAATTAAAGAAATTACACCAAAAATCCCGGTAATTATGACAACCTCAAGCACTCTAT    | 810 |
| <i>tsA_mod/1-996</i> | 730 | TACCGTAAAAGCAACCTGCTCTCTAAGATCAAAAGAGATCACTCCGAAAGATTCCCGTTATCATGACGACCCAGGGCGCTGTAC  | 810 |
| <i>tsA_wt/1-996</i>  | 811 | GATGGGGTTGACATGAGAAAATATGAAGTAGGACGAAAGGCATTAGAAACAGGAATTATCCCGCAAAAGACATGACAAAG      | 891 |
| <i>tsA_mod/1-996</i> | 811 | GACGGAGTGATATGCTAAGTACGAGGTGGGCGCAAAAGCTCTTGAGACCGGTATCATTCGGGCGAAGGATATGACCAAA       | 891 |
| <i>tsA_wt/1-996</i>  | 892 | GAAACAACGATCACAAAGTTAATGTGGGCGCTTGGACACACAAAAGACGTTGAAAAGATAAGAGAAATATGCATACGAAC      | 972 |
| <i>tsA_mod/1-996</i> | 892 | GAGGCTACCATTACGAAACTGATGTGGGCGCTGGGCGATACCAAGGATGTGGAGAAAATTCGTGAGATTATGCACACCAAT     | 972 |
| <i>tsA_wt/1-996</i>  | 973 | TACGTAAATGAAATAAAAAGCTAA                                                              | 996 |
| <i>tsA_mod/1-996</i> | 973 | TATGTGAACGAGATTAAAGAGTTGA                                                             | 996 |

**Figure S2.** Cytotoxic activity of TsA against cancer cells. Cancer cells and normal fibroblasts were cultivated for 72 h in the presence of different concentrations of the enzyme.

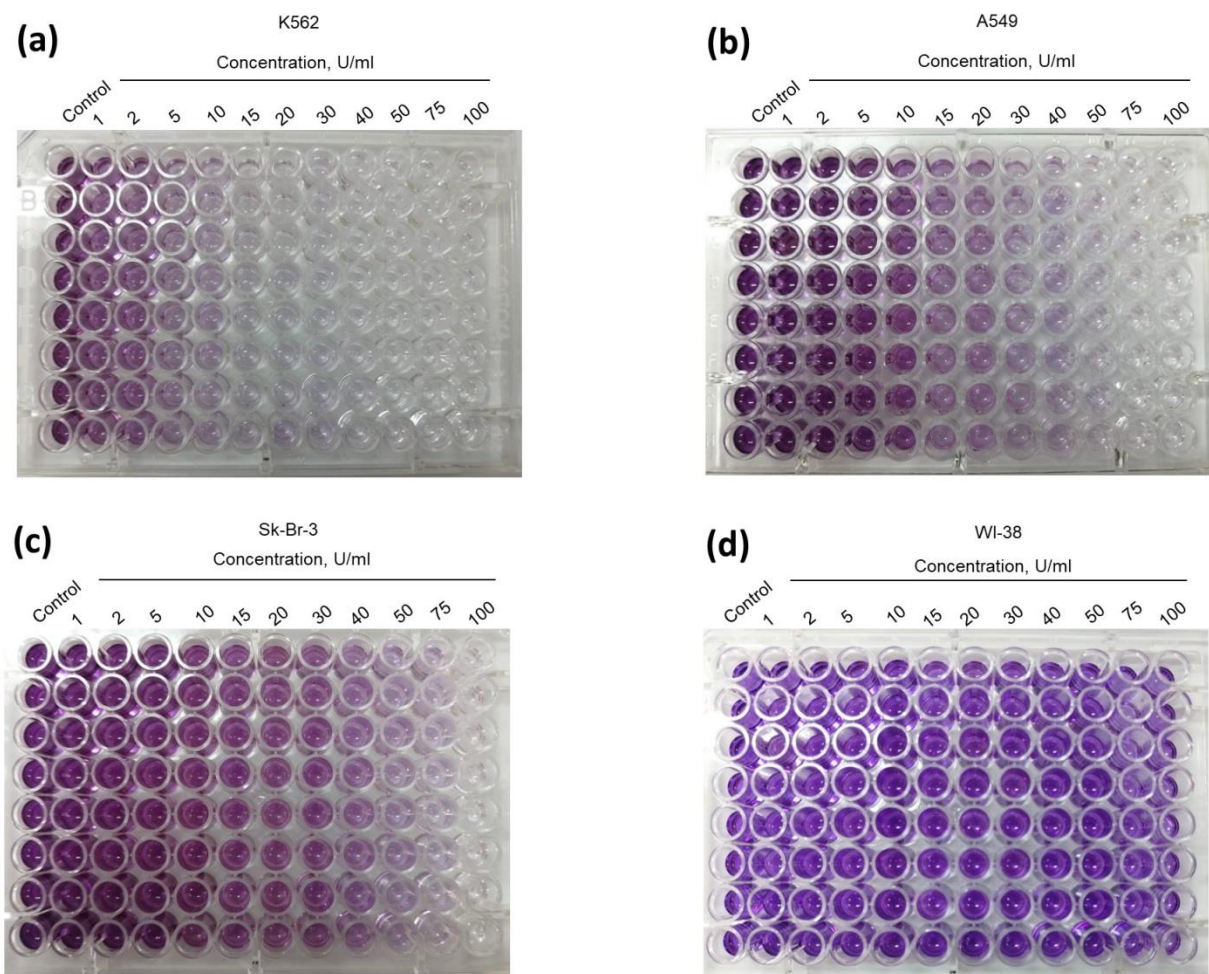

Supplement: s1 [file s1]
